# Supplementary material for: Evaluation of COVID-19 antigen rapid diagnostic tests for self-testing in Lesotho and Zambia
Source: PubMed Central journal article supplement (PMC10903820; doi:10.1371/journal.pone.0280105), 2024-02-29
Supplement: pone.0280105.s002.pdf [file pone.0280105.s002.pdf]

**S2 Appendix.** Participant Form (including Ease-of-use questionnaire) and Observation Form

**Validation of self-testing with Ag-RDTs study**

**Participant's Form\_v1.0\_17012022**

Participant should fill in this form after conducting the self-testing

1. Date (dd/mm/yy) \_\_/\_\_/\_\_
2. My test result is: Positive  Negative  Invalid  I don't know

Only to be filled in if invalid result:

3. If Invalid, have you repeated the self-testing? Yes  No
4. What is the result of your second test? Positive  Negative  Invalid  I don't know

|     |       |                                                                           |                                                                                                                                                                                                                                                                                                                                |                          |
|-----|-------|---------------------------------------------------------------------------|--------------------------------------------------------------------------------------------------------------------------------------------------------------------------------------------------------------------------------------------------------------------------------------------------------------------------------|--------------------------|
| 1   | EASE  | <i>How easy was the Panbio COVID AgRDT to do?</i>                         | 1 = Very easy<br>2 = Somewhat easy<br>3 = Somewhat difficult<br>4 = Very difficult                                                                                                                                                                                                                                             | <input type="checkbox"/> |
| 2   | DFCTY | <i>Which part of the test did you find the most difficult to perform?</i> | 1= Putting the buffer into the extraction tube<br>2 = Collecting the nasal swab.<br>3 = Swirling the swab in the extraction tube<br>4 = Dispensing 5 drops from the tube into the test device<br>5 = Reading the test.<br>6 = All the steps were easy<br>7 = None of the steps were difficult<br>7 = Other difficulty<br>..... | <input type="checkbox"/> |
| 3   | INSTR | <i>How easy was it to understand the instructions provided?</i>           | 1 = Very easy<br>2 = Somewhat easy<br>3 = Somewhat difficult<br>4 = Very difficult                                                                                                                                                                                                                                             | <input type="checkbox"/> |
| 3.1 |       | <i>If responded very difficult, explain why (open text)</i>               | _____<br>_____<br>_____                                                                                                                                                                                                                                                                                                        |                          |
| 4   | WRREF | <i>How much did you rely on the pictures to conduct the test?</i>         | 1 = Very much<br>2 = Somewhat<br>3 = A little<br>4 = Not at all                                                                                                                                                                                                                                                                | <input type="checkbox"/> |

|     |       |                                                                                                               |                                                                                                    |                          |
|-----|-------|---------------------------------------------------------------------------------------------------------------|----------------------------------------------------------------------------------------------------|--------------------------|
| 5   | MHELP | <i>Which was the most helpful piece of instruction?</i>                                                       | 1 = Pictures<br>2 = Written instructions                                                           | <input type="checkbox"/> |
| 6   | SATIS | <i>Overall, how satisfied were you with the self-testing process?</i>                                         | 1 = Very satisfied<br>2 = Somewhat satisfied<br>3 = A little satisfied<br>4 = Not satisfied at all | <input type="checkbox"/> |
| 6.1 |       | <i>If responded Little satisfied or Not satisfied, explain why (open text)</i>                                | _____<br>_____<br>_____                                                                            |                          |
| 7   | RECOM | <i>What would you recommend to improve the experience of self-testing?</i>                                    | .....<br>.....<br>.....<br>.....                                                                   |                          |
| 8   |       | <i>Do you believe that your test <u>result</u> was <u>correct</u>?</i>                                        | 1 = Definitely correct<br>2 = Probably correct<br>3 = Not correct                                  | <input type="checkbox"/> |
| 9   | RCKIT | <i>Would you recommend this COVID test kit for self-testing to friends and family?</i>                        | 1 = Yes<br>2 = No                                                                                  | <input type="checkbox"/> |
| 10  | STFT  | <i>How likely would you be to self-test in the future if kits were made available for the general public?</i> | 1 = Very likely<br>2 = Somewhat likely<br>3 = Not likely at all<br>4 = Never again                 | <input type="checkbox"/> |

**Validation of self-testing with Ag-RDTs study**

**Observation Form\_v1.0\_26012022**

1. Date (dd/mm/yy) \_/ \_/ \_

2. Name of person filling-in the form: \_\_\_\_\_

| <b>Steps</b>                                                                                 | <b>Correctly performed?</b>                                 | <b>Comments (if no why not, what went wrong)</b> |
|----------------------------------------------------------------------------------------------|-------------------------------------------------------------|--------------------------------------------------|
| 1. Opening of the packaging                                                                  | Yes <input type="checkbox"/><br>No <input type="checkbox"/> |                                                  |
| 2. Opening the Buffer Bottle while keeping it vertically                                     | Yes <input type="checkbox"/><br>No <input type="checkbox"/> |                                                  |
| 3. Squeezing liquid from Buffer Bottle into Tube                                             | Yes <input type="checkbox"/><br>No <input type="checkbox"/> |                                                  |
| 4. Filling the Tube with liquid up or slightly above the fill line                           | Yes <input type="checkbox"/><br>No <input type="checkbox"/> |                                                  |
| 5. Placing the Tube in the rack                                                              | Yes <input type="checkbox"/><br>No <input type="checkbox"/> |                                                  |
| 6. Open swab protective package and taking swab out while keeping fingers out of swab end    | Yes <input type="checkbox"/><br>No <input type="checkbox"/> |                                                  |
| 7. Inserting soft end of swab less than one inch (about 2 cm) into nostril                   | Yes <input type="checkbox"/><br>No <input type="checkbox"/> |                                                  |
| 8. Rotating the swab five times against the nasal wall.                                      | Yes <input type="checkbox"/><br>No <input type="checkbox"/> |                                                  |
| 9. Using the same swab repeat collection procedure with the second nostril                   | Yes <input type="checkbox"/><br>No <input type="checkbox"/> |                                                  |
| 10. Inserting the swab into the Tube                                                         | Yes <input type="checkbox"/><br>No <input type="checkbox"/> |                                                  |
| 11. Swirling the swab tip inside the Tube, pushing into the wall of Tube at least five times | Yes <input type="checkbox"/><br>No <input type="checkbox"/> |                                                  |
| 12. Squeezing out the swab by squeezing the Tube with fingers                                | Yes <input type="checkbox"/><br>No <input type="checkbox"/> |                                                  |
| 13. Breaking the swab at the breakpoint and closing the cap of Tube                          | Yes <input type="checkbox"/><br>No <input type="checkbox"/> |                                                  |

|                                                                                                               |                                                                                                            |  |
|---------------------------------------------------------------------------------------------------------------|------------------------------------------------------------------------------------------------------------|--|
| 14. Remove test device from package and place flat on surface                                                 | Yes <input type="checkbox"/><br>No <input type="checkbox"/>                                                |  |
| 15. Check liquid in the Tube for bubbles                                                                      | Yes <input type="checkbox"/><br>No <input type="checkbox"/>                                                |  |
| 16. Opening the white cap and dispensing 5 drops vertically on the device                                     | Yes <input type="checkbox"/><br>No <input type="checkbox"/>                                                |  |
| 17. Do not move or touch device until the test is finished                                                    | Yes <input type="checkbox"/><br>No <input type="checkbox"/>                                                |  |
| 18. Reading result at 15 minutes.                                                                             | Yes <input type="checkbox"/><br>No <input type="checkbox"/>                                                |  |
| 19. Has the participant completed the self-testing procedure?                                                 | Yes <input type="checkbox"/><br>No <input type="checkbox"/>                                                |  |
| <b>Results section</b><br><b>(please check result on test device and recorded result on Participant Form)</b> |                                                                                                            |  |
| 20. What is the <b>result on the test device</b> ?                                                            | Positive <input type="checkbox"/><br>Negative <input type="checkbox"/><br>Invalid <input type="checkbox"/> |  |
| 21. What is the <b>result recorded on Participant's Form</b> ?                                                | Positive <input type="checkbox"/><br>Negative <input type="checkbox"/><br>Invalid <input type="checkbox"/> |  |
| 22. Was the self-testing repeated?                                                                            | Yes <input type="checkbox"/><br>No <input type="checkbox"/>                                                |  |
| 23. What is the <b>result on the test device for repeated testing</b> ?                                       | Positive <input type="checkbox"/><br>Negative <input type="checkbox"/><br>Invalid <input type="checkbox"/> |  |
| 24. What is the <b>result recorded on Participant's Form for repeated testing</b> ?                           | Positive <input type="checkbox"/><br>Negative <input type="checkbox"/><br>Invalid <input type="checkbox"/> |  |
